# Supplementary material for: A multicolor nano-immunosensor for the detection of multiple targets
Source: Royal Society of Chemistry journal article supplement (doi:10.1039/c3ra41846d), 2013-01-01
Supplement: c3ra41846d.pdf [file c3ra41846d.pdf]

# Supporting Information

## **A multicolor nano-immunosensor for the detection of multiple targets**

Ming Shi,<sup>a,b</sup> Jia Chen,<sup>a</sup> Yong Huang,<sup>\*,a</sup> Kun Hu,<sup>a</sup> Shulin Zhao,<sup>\*,a</sup> Zhen-Feng Chen<sup>a</sup> and Hong Liang<sup>\*,a</sup>

<sup>a</sup> Key Laboratory for the Chemistry and Molecular Engineering of Medicinal Resources (Ministry of Education), College of Chemistry and Chemical Engineering, Guangxi Normal University, Guilin 541004, China

<sup>b</sup> Department of Chemistry, Guilin Normal College, Guilin 541001, China

E-mail: zhaoshulin001@163.com; hliang@gxnu.edu.cn; huangyong\_2009@163.com

Tel: (+86) 773 5856104

Fax: (+86) 773-583-2294

**Table S1.** Determination of LE, PP and cTnI in the spiked human serum samples

| Sample | Analyte | Added [pg/mL] | Found [pg/mL] | RSD [%, n=5] | Recovery [%] |
|--------|---------|---------------|---------------|--------------|--------------|
| 1      | LE      | 50            | 48.6          | 4.8          | 97.2         |
|        | PP      | 50            | 48.4          | 5.1          | 96.8         |
|        | cTnI    | 50            | 47.8          | 3.2          | 95.6         |
| 2      | LE      | 200           | 206.4         | 1.9          | 103.2        |
|        | PP      | 200           | 198.8         | 2.5          | 99.4         |
|        | cTnI    | 200           | 196.4         | 3.9          | 98.2         |
| 3      | LE      | 1000          | 965.0         | 4.3          | 96.5         |
|        | PP      | 1000          | 988.1         | 2.7          | 98.8         |
|        | cTnI    | 1000          | 960.8         | 3.6          | 96.1         |

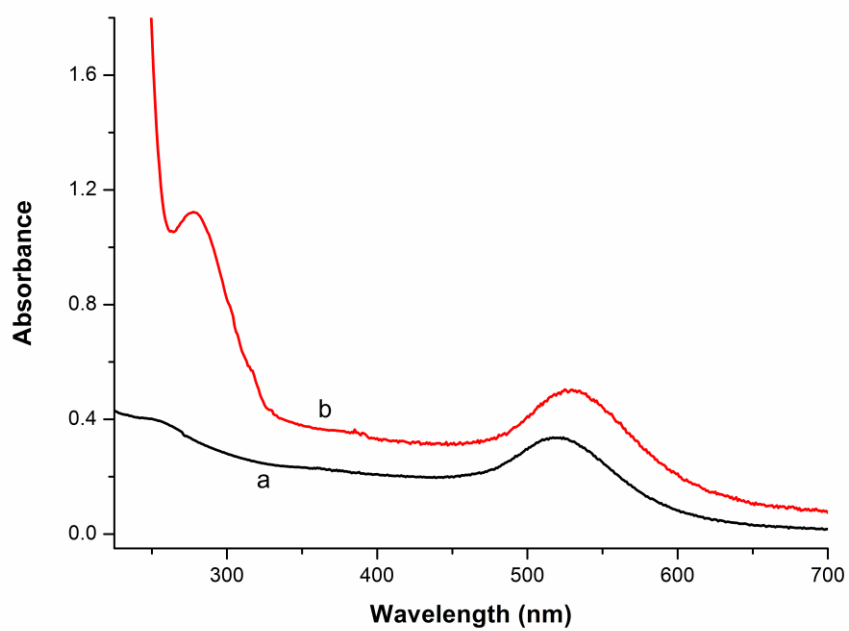

**Figure S1.** UV-vis spectra of AuNPs (a) and AuNPs-Ab (b).

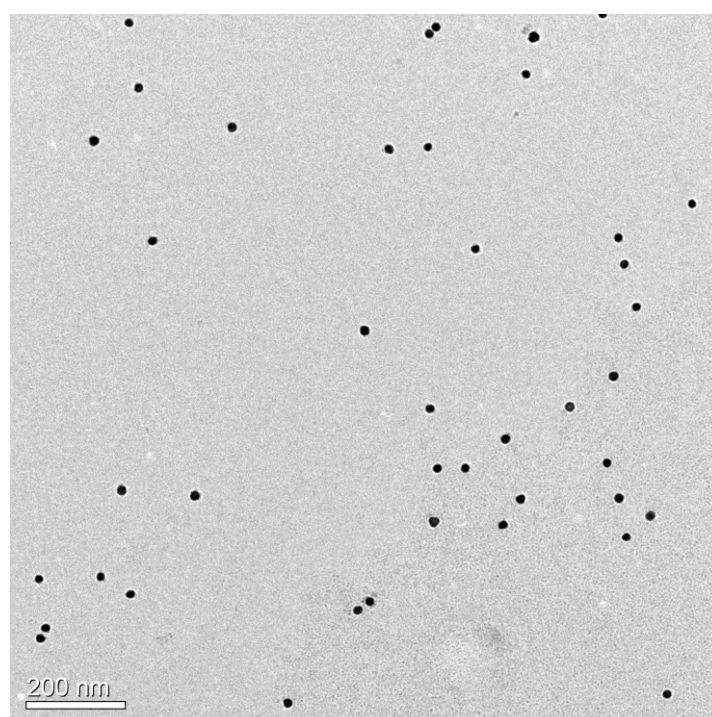

**Figure S2.** TEM image of AuNPs

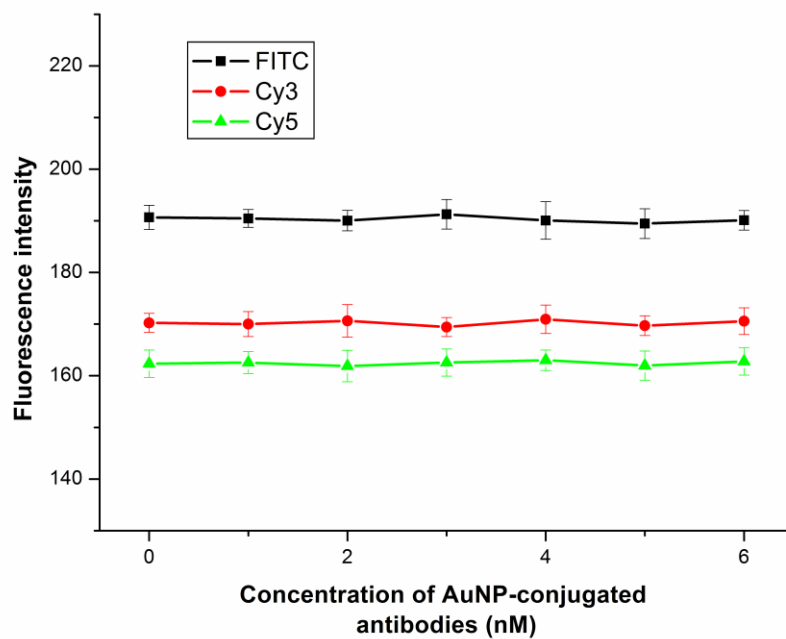

**Figure S3.** Fluorescence intensity of free dyes by AuNPs-Ab conjugates with concentrations ranging from 0 to 6 nM. In these experiments, AuNPs-Ab conjugates were simply mixed with free dyes (without its conjugation to peptide antigens) and unmodified peptide antigens.
